# Supplementary material for: Clinical Prospect of Mesenchymal Stromal/Stem Cell-Derived Extracellular Vesicles in Kidney Disease: Challenges and the Way Forward
Source: MDPI journal article supplement (doi:10.3390/pharmaceutics15071911), 2023-07-09
Supplement: s1 [file s1]

**Supplementary Table S1. Proposed mechanisms of MSC-EVs related to immunological effects**

| MSCs origin | MSCs manipulation | MSCs medium before EVs isolation          | EVs isolation method | Disease model              | Effects                                                                                                                                                | Target cells                                                                    | Mechanism (molecule(s) or signaling pathways identified)                                                                                                                              | Confirmation method                                                       | Ref. No. |
|-------------|-------------------|-------------------------------------------|----------------------|----------------------------|--------------------------------------------------------------------------------------------------------------------------------------------------------|---------------------------------------------------------------------------------|---------------------------------------------------------------------------------------------------------------------------------------------------------------------------------------|---------------------------------------------------------------------------|----------|
| hUC         | /                 | serum-free DMEM/F12                       | UC                   | murine chronic salpingitis | Improvement of the local inflammatory microenvironment of fallopian tubes and inhibition of tube inflammation; alleviation of tubal factor infertility | RAW 264.7                                                                       | Macrophage polarization from M1 to M2 via NF- $\kappa$ B signaling pathway, lower expression of p65 and TLR4                                                                          | /                                                                         | [1]      |
| mBM         | /                 | medium containing 5% exosome-depleted FBS | UC                   | murine myocardial IRI      | Polarization to M2 macrophages; reduction of infarct size and alleviation of inflammation level in heart and serum                                     | RAW264.7                                                                        | miR-182 mediator of macrophage polarization and TLR4 as a downstream target                                                                                                           | systemic depletion of macrophages; diminishing miR-182; knockdown of TLR4 | [2]      |
| mBM         | /                 | DMEM/F12 with 10% EVs-depleted FBS        | UC                   | LPS-induced ARDS           | Inhibition of M1 and promotion of M2 polarization in vitro; amelioration of LPS-induced inflammation and lung damage                                   | MH-S                                                                            | Inhibition of cellular glycolysis via HIF-1a inhibition                                                                                                                               | HIF-1a siRNA                                                              | [3]      |
| hESC        | /                 | /                                         | TFF + HPLC + UF      | mouse skin graft GVHD      | Activation of APCs; induction of anti-inflammatory M2; elicitation of Treg; enhancement of allogeneic skin graft                                       | HEK-Blue-hTLR4 and hTLR2; THP1-Xblue; THP1 XBlue-defMYD; monocytes, splenocytes | Activation of APCs via MyD88-dependent translocation of NF $\kappa$ B through TLR4; M2 induction through MyD88 only in I phase; Treg induction via M2-like monocytes, MYD88-dependent | use of MyD88-deficient cells                                              | [4]      |

| MSCs origin | MSCs manipulation          | MSCs medium before EVs isolation            | EVs isolation method                  | Disease model                      | Effects                                                                                                                                           | Target cells                 | Mechanism (molecule(s) or signaling pathways identified)                                                                                                                                                      | Confirmation method                                                            | Ref. No. |
|-------------|----------------------------|---------------------------------------------|---------------------------------------|------------------------------------|---------------------------------------------------------------------------------------------------------------------------------------------------|------------------------------|---------------------------------------------------------------------------------------------------------------------------------------------------------------------------------------------------------------|--------------------------------------------------------------------------------|----------|
| BM          | transfection of miR-223-3p | a-MEM medium                                | UC                                    | autoimmune hepatitis               | Decrease of inflammatory cytokines from liver and macrophages; lower inflammatory responses in the liver; elevation of the Treg/Th17 ratio        | RAW264.7                     | miRNA-223-3p-mediated negative regulation of STAT3, IL-1 $\beta$ and IL-6 expressions                                                                                                                         | miR-223 knockdown                                                              | [5]      |
| hUC         | /                          | /                                           | "ExoQuick"                            | SLF                                | Attenuation of respiratory system function, NLRP3 activation, and fibrosis                                                                        | RAW264.7                     | EVs affect circPWWP2A/ miR-223-3p /NLRP3 regulatory pathway                                                                                                                                                   | siRNAs of NLRP3<br>siRNA of circPWWP2A;<br>miR-223-3p mimics                   | [6]      |
| mBM         | /                          | FBS-free RPMI-1640                          | UC                                    | mouse sepsis                       | Inhibition of CLP-induced sepsis                                                                                                                  | BM-derived macrophages       | miRNA-27b targets JMJD3 and downregulates NF- $\kappa$ B                                                                                                                                                      | miR-27b knockdown;<br>miR-27b-mimic                                            | [7]      |
| rat BM      | /                          | serum-free stem cell medium                 | sucrose/D2O cushion UC                | rat SCI                            | Amelioration of SCI symptoms; promotion of M2 polarization                                                                                        | RAW264.7                     | miR-125a from EVs inhibits IRF5 expression                                                                                                                                                                    | overexpression of IRF5;<br>miR-125a knockdown                                  | [8]      |
| mBM         | /                          | RPMI 1640 medium                            | "Total Exosome Isolation Reagent Kit" | atherosclerosis                    | Reduction of plaque area and macrophage infiltration; M2 polarization                                                                             | RAW264.7                     | miR-21a-5p targets KLF6 and ERK2 suppressing KLF6 and ERK1/2 -> M2 polarization, inhibition of migration                                                                                                      | miR-21a-5p overexpression in RAW264.7 cells                                    | [9]      |
| mBM         | /                          | medium with EVs-free serum                  | TFF+HPLC+ UF                          | atherosclerosis                    | Decrease of atherosclerotic plaque; reduction of macrophage infiltration; M2 polarization                                                         | U-937                        | miR-let7 induces M2 polarization via miR-let7/HMGA2/NF- $\kappa$ B and suppresses macrophage infiltration via miR-let7/IGF2BP1/PTEN                                                                           | miR-let7 mimics and inhibitors in U937 cells                                   | [10]     |
| hBM         | /                          | $\alpha$ -MEM with 10% exosome-depleted FBS | UC                                    | IBD models of experimental colitis | Mitigation of colitis; downregulation of inflammatory responses; maintenance of intestinal barrier integrity<br>M2 polarization and IL-10 release | Monocyte-derived macrophages | MT-2 from EVs is necessary for uptake into macrophages; MT-2 inhibits inflammatory response via attenuation of NF- $\kappa$ B, i.e., by modulating I $\kappa$ B $\alpha$ expression via interacting with MZF1 | Depletion of colonic macrophage;<br>Neutralization of IL-10;<br>MT-2 knockdown | [11]     |

| MSCs origin | MSCs manipulation | MSCs medium before EVs isolation                          | EVs isolation method | Disease model                     | Effects                                                                                                                                     | Target cells                                | Mechanism (molecule(s) or signaling pathways identified)                                                                               | Confirmation method                                        | Ref. No. |
|-------------|-------------------|-----------------------------------------------------------|----------------------|-----------------------------------|---------------------------------------------------------------------------------------------------------------------------------------------|---------------------------------------------|----------------------------------------------------------------------------------------------------------------------------------------|------------------------------------------------------------|----------|
| mBM         | /                 | DMEM-LG medium                                            | "ExoQuick"           | mice kidney transplant model      | Prolong the allogenic kidney graft survival                                                                                                 | DCs                                         | Inhibiting DCs maturity by increasing miR-146a in DCs; reduction of IL-12 mRNA expression and IL-12 production of mDCs                 | miR-146a silencing                                         | [12]     |
| hBM         | /                 | basal medium supplemented with 10% human platelets lysate | UC                   | /                                 | Impairment of antigen uptake by immature DCs; impairment of DC migration                                                                    | DCs                                         | Impairment of DC migration via suppression of CCR7; miRNA-21-5p partially mimics the function of MSC-EV treatment on DCs               | miR-21-5p overexpression in DCs                            | [13]     |
| hUC         | /                 | DMEM with 0.5% BSA                                        | UC                   | rat model of renal IRI            | Suppression of IRI-induced up-regulation of NK cells in spleen and ischemic kidney; protective role after the removal of spleen in IRI rats | HUVECs; NRK-52E                             | RNA involvement; downregulation of CX3CL1 and TLR-2                                                                                    | Depletion of NK cells; RNA-specific fluorescent dye (SYTO) | [14]     |
| hFL         | /                 | exosome-depleted FBS a-MEM complete medium                | UC                   | /                                 | Impairment of NK cell function                                                                                                              | human NK cells                              | Activation of TGFβ/Smad pathway in NK cells by EVs, via TGFβ on their surface                                                          | Detection of pSmad2/3; anti-TGFβ neutralizing antibody     | [15]     |
| hESCs       | /                 | supplemented DMEM                                         | TFF + UF             | /                                 | Inhibition of complement-induced neutrophil activation                                                                                      | neutrophils                                 | EVs inhibit complement-induced neutrophil activation through a CD59-dependent mechanism                                                | anti-CD59 antibody abrogated the inhibitory effects of EVs | [16]     |
| hBM         | /                 | serum-deprived medium                                     | UC                   | mouse intracranial aneurysm model | Reduction of aneurysmal rupture rate; suppression of mast cells activation                                                                  | primary cultures of murine mast cells; LAD2 | EVs cause the upregulation of PGE2 production via up-regulation of mRNA expression of COX2 and upregulation of EP4 receptor expression | COX2 inhibitor; EP4 antagonist                             | [17]     |

| MSCs origin                   | MSCs manipulation | MSCs medium before EVs isolation                  | EVs isolation method | Disease model | Effects                                                                                                                                              | Target cells                       | Mechanism (molecule(s) or signaling pathways identified)                                                                        | Confirmation method                                                                              | Ref. No. |
|-------------------------------|-------------------|---------------------------------------------------|----------------------|---------------|------------------------------------------------------------------------------------------------------------------------------------------------------|------------------------------------|---------------------------------------------------------------------------------------------------------------------------------|--------------------------------------------------------------------------------------------------|----------|
| hUC                           | /                 | $\alpha$ -MEM containing 5% human platelet lysate | TFF + diafiltration  | /             | Attenuation of induced ROS generation, degranulation, and production of proinflammatory cytokines; inhibition of inflammatory and allergic reactions | KU812 cells                        | Suppression of NF- $\kappa$ B and MAPK                                                                                          | /                                                                                                | [18]     |
| endometrium (menstrual blood) | /                 | DMEM containing 1% insulin-transferrin-selenium   | UC                   | /             | T cell activation                                                                                                                                    | PBLs                               | EVs inhibitory effect against CD4+ T cell activation is mediated via TGF $\beta$ signaling                                      | Anti-TGF $\beta$ neutralizing antibodies                                                         | [19]     |
| canine-UC                     | /                 | serum-free supplemented DMEM                      | UC                   | /             | Inhibition of CD4+ T cell proliferation                                                                                                              | T cells                            | TGF $\beta$ and adenosine signaling                                                                                             | TGF $\beta$ RI antagonist; neutralizing antibodies to TGF $\beta$ ; A2A adenosine receptor block | [20]     |
| hUC; BM                       | /                 | serum-free medium                                 | UC                   | /             | Suppressed proliferation of T cells                                                                                                                  | T cells                            | CD39-expressing T cells produce AMP from ATP and MSCs produce adenosine from AMP via CD73, causing immunosuppression of T cells | /                                                                                                | [21]     |
| hBM                           | /                 | DMEM supplemented with EVs-depleted FBS           | UC                   | /             | EVs decrease the proliferation of activated PBMCs or isolated T and B cells; inhibited the production of IgM by B cells                              | PBMCs; isolated B and T lymphocyte | Increase of CXCL8 and MZB1 in B cells upon EVs treatment                                                                        | /                                                                                                | [22]     |

**Supplementary Table S2. Proposed mechanisms of MSC-EVs related to regenerative effects**

| Origin of MSC               | MSCs manipulation | MSCs medium before EVs isolation           | EVs isolation method | Disease model            | Effects                                                                                                                                                       | Target cells                                  | Mechanism (molecule(s) or signaling pathways identified)                                                                                                                                                                          | Confirmation method                                         | Ref. No. |
|-----------------------------|-------------------|--------------------------------------------|----------------------|--------------------------|---------------------------------------------------------------------------------------------------------------------------------------------------------------|-----------------------------------------------|-----------------------------------------------------------------------------------------------------------------------------------------------------------------------------------------------------------------------------------|-------------------------------------------------------------|----------|
| hUC                         | /                 | FBS-depleted DMEM with 0.5% BSA            | UC                   | renal IRI in rats        | Decline of ROS, oxidative stress, and fibrosis; ameliorated renal function; reduced apoptosis and enhanced proliferation                                      | NRK-52E; HUVECs                               | NOX2 downregulation                                                                                                                                                                                                               | NOX2 downregulation both <i>in vivo</i> and <i>in vitro</i> | [23]     |
| hUC                         | /                 | FBS-depleted DMEM with 0.5% BSA            | UC                   | renal IRI in rats        | Alleviation of renal tissue injury and apoptosis                                                                                                              | NRK-52E                                       | Activation of Nrf2/ARE, up-regulation of HO-1                                                                                                                                                                                     | comparison to non-MSC EVs                                   | [24]     |
| hESC-derived HuES9.E 1 MSCs | /                 | serum-free culture medium                  | TFF + UF + HPLC      | liver injury             | Increase in hepatocyte proliferation, viability, and survival rate; induction of quiescent hepatocytes (G0) to re-enter the cell cycle (G1)                   | 3 hepatocytes cell lines: TAMH, THLE-2, HuH-7 | Induction of regenerative genes (NF- $\kappa$ B, cyclin D1, and cyclin E); protection from apoptosis by decreasing caspase 3/7 level while upregulating Bcl-xL; induction of transcription factors expression during the G1 phase | dose dependency                                             | [25]     |
| rat BM                      | /                 | EVs-depleted FBS-containing medium         | UC                   | rat severe SCI           | Improvement of locomotor functional recovery; inhibition of neuronal apoptosis                                                                                | neuron cells from the spinal cord             | Wnt/ $\beta$ -catenin                                                                                                                                                                                                             | Wnt/ $\beta$ -catenin signaling pathway inhibitor           | [26]     |
| hBM                         | /                 | $\alpha$ -MEM medium with EVs depleted-FCS | UC                   | osteoarthritiss          | Promotion of proliferation, migration, and reduction of apoptosis; alleviation of IL-1 $\beta$ -induced catabolic effects on chondrocytes from osteoarthritis | chondrocytes from osteoarthritiss patients    | Downregulation of Erk1/2, PI3K/Akt, p38, TAK1, and NF- $\kappa$ B signaling pathways                                                                                                                                              | /                                                           | [27]     |
| hESC-derived HuES9.E 1 MSCs | /                 | supplemented DMEM                          | TFF+HPLC+ UF         | IRI model of MCI in mice | Reduction of IRI; improvement of cardiac performance; reduction of oxidative stress and inflammation                                                          | /                                             | Activation of PI3K/Akt pathway                                                                                                                                                                                                    | /                                                           | [28]     |

| Origin of MSC | MSCs manipulation     | MSCs medium before EVs isolation  | EVs isolation method | Disease model                                                | Effects                                                                                            | Target cells                          | Mechanism (molecule(s) or signaling pathways identified)                                                                                                                                                                                         | Confirmation method                                                                                                 | Ref. No. |
|---------------|-----------------------|-----------------------------------|----------------------|--------------------------------------------------------------|----------------------------------------------------------------------------------------------------|---------------------------------------|--------------------------------------------------------------------------------------------------------------------------------------------------------------------------------------------------------------------------------------------------|---------------------------------------------------------------------------------------------------------------------|----------|
| hBM           | /                     | RPMI containing 0.5% BSA          | UC                   | <i>in vitro</i> IRI of renal cells; ATP depletion injury     | Reduction of transepithelial resistance loss                                                       | HK-2                                  | Uptake via CD229 and CD44; delivery and upregulation of miRNA; reversal of miRNA changes in target cell; downregulation of coding-mRNAs associated with apoptosis, cytoskeleton reorganization, and hypoxia, such as CASP3 and 7, SHC1 and SMAD4 | Blocking EVs uptake by antibody to CD29 or hyaluronic acid to block CD44; transcription inhibition by actinomycin D | [29]     |
| mBM<br>hBM    | /                     | Vesicle-depleted medium           | UC                   | lethal murine model of hepatic failure                       | Reduction of inflammation and hepatic injury; modulation of cytokine expression; survival increase | human hepatocytes                     | lncRNA Y-RNA-1 from EVs mediates the reduction of apoptosis in hepatocytes                                                                                                                                                                       | siRNA-mediated knockdown of Y-RNA-1 in hBM-MSC                                                                      | [30]     |
| mBM           | ISCP                  | serum-free medium                 | UC, ExoQuick         | mouse MCI                                                    | Reduction of cardiomyocyte apoptosis; amelioration of fibrosis post-MCI                            | neonatal cardiomyocytes               | miR-22 carried by EV target Mecp2 (methyl CpG binding protein 2) which is upregulated in infarcted hearts                                                                                                                                        | miR-22 mimic; miR-22 inhibitor; knockdown of Mecp2 by siRNAs                                                        | [31]     |
| rat BM        | GATA-4 overexpression | serum- and antibiotic-free medium | ExoQuick             | cardiomyocytes ischemic injury, <i>in vitro</i> model of MCI | Reduction of apoptosis; cardioprotection                                                           | neonatal rat ventricle cardiomyocytes | GATA-4 increases miR-221 in MSC; EVs transport miR-221 to cardiomyocytes reducing the expression of PUMA, i.e., reducing apoptosis                                                                                                               | Overexpression of miR-221 in MSCs; co-transfection of lenti-miR-221 vector and full-length 3' UTR sequence of PUMA  | [32]     |
| mBM           | hypoxia-conditioning  | EVs depleted $\alpha$ -MEM        | UC                   | mouse MCI model                                              | Improvement of cardiac function; attenuation of apoptosis                                          | H9C2 rat cardiomyoblast               | Improved targeted delivery of EVs by conjugating them with a "CSTSMKAC" peptide; anti-apoptotic effect of miR-125b contained in EVs                                                                                                              | knockdown of miR-125b-5p                                                                                            | [33]     |

| Origin of MSC | MSCs manipulation                   | MSCs medium before EVs isolation   | EVs isolation method         | Disease model                      | Effects                                                                                                                                                                                                                            | Target cells                                               | Mechanism (molecule(s) or signaling pathways identified)                                                                                         | Confirmation method                                                               | Ref. No. |
|---------------|-------------------------------------|------------------------------------|------------------------------|------------------------------------|------------------------------------------------------------------------------------------------------------------------------------------------------------------------------------------------------------------------------------|------------------------------------------------------------|--------------------------------------------------------------------------------------------------------------------------------------------------|-----------------------------------------------------------------------------------|----------|
| rat BM        | /                                   | EVs-depleted FBS-containing medium | UF + sucrose /D2O cushion-UC | rat rotator cuff reconstruction    | Promotion of proliferation, migration, and angiogenic tube formation in HUVECs; promotion of angiogenesis around the tendon-bone interface of the rotator cuff; lower inflammation by the inhibition of M1 macrophage polarization | U937 cells; HUVECs                                         | Activation of the angiogenic signaling pathway, i.e., VEGFR phosphorylation which inhibits phosphorylation of LATS1/2 and YAP1                   | VEGFR inhibitor (Nintedanib)                                                      | [34]     |
| hAT           | LV-mediated transfer of pre-miR-122 | MesenPRO RS™ medium                | "ExoQuick"                   | liver fibrosis                     | Suppression of the proliferation and collagen maturation in LX-2 cells; alleviation of collagen deposition                                                                                                                         | LX-2                                                       | miR-122I targets IGF1R, CCNG1 and P4HA1                                                                                                          | /                                                                                 | [35]     |
| hUC           | /                                   | serum-free DMEM                    | UF + sucrose/D2O cushion-UC  | rat BIS                            | Promotion of cell proliferation and re-epithelialization; inhibition of apoptosis                                                                                                                                                  | HLF; Keratinocytes, HaCAT; Dermal fibroblasts              | Parallel activation of Wnt4/β-catenin and AKT signaling                                                                                          | knockdown of Wnt4; inhibition of AKT                                              | [36]     |
| h             | /                                   | /                                  | sequential TFF               | rat periodontal defect             | Promotion of regeneration of critical-size periodontal defects; proliferation and cell migration increase                                                                                                                          | periodontal ligament cells                                 | AR-mediated activation of AKT and ERK signaling pathways                                                                                         | wortmannin (inhibitor of PI3K/AKT pathway); U0126 (inhibitor of MAPK/ERK pathway) | [37]     |
| h gingiva     | /                                   | a-MEM with 1% EVs depleted FBS     | UF + 'ExoQuick'              | crush injury of mice sciatic nerve | Promotion of axonal repair and functional recovery of the crush-injured mice's sciatic nerves; promotion of proliferation and migration of Schwann cells                                                                           | rat Schwann cell line RT4-D6P2T; primary rat Schwann cells | Upregulation of the expression of genes, driving the dedifferentiation and activation of the repair phenotype of Schwann cells: c-JUN and Notch1 | GW4869, an exosome/EVs inhibitor                                                  | [38]     |

| Origin of MSC | MSCs manipulation | MSCs medium before EVs isolation           | EVs isolation method | Disease model | Effects                                                           | Target cells                 | Mechanism (molecule(s) or signaling pathways identified) | Confirmation method         | Ref. No. |
|---------------|-------------------|--------------------------------------------|----------------------|---------------|-------------------------------------------------------------------|------------------------------|----------------------------------------------------------|-----------------------------|----------|
| hBM;<br>mBM   | /                 | medium containing EVs-free platelet lysate | UC                   | /             | Regeneration of damaged RPTECs; increase of RPTEC's proliferation | hDF human, mouse RPTECs; HK2 | EVs transfer IGF-1R mRNA                                 | Silencing of IGF-1 receptor | [39]     |

hUC – human umbilical cord, hAT – human adipose tissue, mBM – mouse bone marrow, hBM – human bone marrow, hFL - human fetal liver UC – ultracentrifugation, TFF – tangential flow filtration; HPLC – high performance liquid chromatography; UUO – unilateral ureteral obstruction, AKI – acute kidney disease, IRI - ischemia-reperfusion injury; RAW 264.7 (mouse macrophage cell line); U-937 (human monocyte cell line); murine alveolar macrophage cell line MH-S; HIF-1 $\alpha$  - hypoxia-inducible factor 1 alpha; TLR4 - toll-like receptor 4; SCI - model of spinal cord injury; MZF1 - myeloid zinc finger 1; LAD2 - human mast cell line; PGE2 - prostaglandin E2; EP4 - E-prostanoid 4; HMC-1 - human mast cell line; KU812 - immature human basophilic leukocyte; PBLs - peripheral blood lymphocytes; PBMCs - peripheral blood mononuclear cells; MCI - myocardial infarction; HK-2 (renal proximal tubular epithelial cells); ISCP - ischemic preconditioning; PUMA - p53 upregulated modulator of apoptosis; LX-2 - hepatic stellate cells line; LV – lentivirus; BIS - deep second-degree burn injury skin wound model; HLF - human lung fibroblasts; HaCaT - spontaneously immortalized keratinocyte cell line from the adult human skin; AR - adenosine receptor; RPTECs – renal proximal tubular epithelial cells; hDF – human dermal fibroblasts; MT2 - Metallothionein 2; hESC - huES9.E1 cell line; SLF - model of silicosis lung fibrosis; NK - natural killer cells.

## References

1. Zhang, C.; Liao, W.; Li, W.; Li, M.; Xu, X.; Sun, H.; Xue, Y.; Liu, L.; Qiu, J.; Zhang, X.; et al. Human umbilical cord mesenchymal stem cells derived extracellular vesicles alleviate salpingitis by promoting M1-to-M2 transformation. *Front Physiol* **2023**, *14*, 1131701, doi:10.3389/fphys.2023.1131701.
2. Zhao, J.; Li, X.; Hu, J.; Chen, F.; Qiao, S.; Sun, X.; Gao, L.; Xie, J.; Xu, B. Mesenchymal stromal cell-derived exosomes attenuate myocardial ischaemia-reperfusion injury through miR-182-regulated macrophage polarization. *Cardiovasc Res* **2019**, *115*, 1205-1216, doi:10.1093/cvr/cvz040.
3. Deng, H.; Wu, L.; Liu, M.; Zhu, L.; Chen, Y.; Zhou, H.; Shi, X.; Wei, J.; Zheng, L.; Hu, X.; et al. Bone Marrow Mesenchymal Stem Cell-Derived Exosomes Attenuate LPS-Induced ARDS by Modulating Macrophage Polarization Through Inhibiting Glycolysis in Macrophages. *Shock* **2020**, *54*, 828-843, doi:10.1097/SHK.0000000000001549.
4. Zhang, B.; Yin, Y.; Lai, R.C.; Tan, S.S.; Choo, A.B.; Lim, S.K. Mesenchymal stem cells secrete immunologically active exosomes. *Stem Cells Dev* **2014**, *23*, 1233-1244, doi:10.1089/scd.2013.0479.
5. Lu, F.B.; Chen, D.Z.; Chen, L.; Hu, E.D.; Wu, J.L.; Li, H.; Gong, Y.W.; Lin, Z.; Wang, X.D.; Li, J.; et al. Attenuation of Experimental Autoimmune Hepatitis in Mice with Bone Mesenchymal Stem Cell-Derived Exosomes Carrying MicroRNA-223-3p. *Mol Cells* **2019**, *42*, 906-918, doi:10.14348/molcells.2019.2283.
6. Hou, L.; Zhu, Z.; Jiang, F.; Zhao, J.; Jia, Q.; Jiang, Q.; Wang, H.; Xue, W.; Wang, Y.; Tian, L. Human umbilical cord mesenchymal stem cell-derived extracellular vesicles alleviated silica induced lung inflammation and fibrosis in mice via circPWWP2A/miR-223-3p/NLRP3 axis. *Ecotoxicol Environ Saf* **2023**, *251*, 114537, doi:10.1016/j.ecoenv.2023.114537.
7. Sun, J.; Sun, X.; Chen, J.; Liao, X.; He, Y.; Wang, J.; Chen, R.; Hu, S.; Qiu, C. microRNA-27b shuttled by mesenchymal stem cell-derived exosomes prevents sepsis by targeting JMJD3 and downregulating NF- $\kappa$ B signaling pathway. *Stem Cell Res Ther* **2021**, *12*, 14, doi:10.1186/s13287-020-02068-w.
8. Chang, Q.; Hao, Y.; Wang, Y.; Zhou, Y.; Zhuo, H.; Zhao, G. Bone marrow mesenchymal stem cell-derived exosomal microRNA-125a promotes M2 macrophage polarization in spinal cord injury by downregulating IRF5. *Brain Res Bull* **2021**, *170*, 199-210, doi:10.1016/j.brainresbull.2021.02.015.
9. Ma, J.; Chen, L.; Zhu, X.; Li, Q.; Hu, L.; Li, H. Mesenchymal stem cell-derived exosomal miR-21a-5p promotes M2 macrophage polarization and reduces macrophage infiltration to attenuate atherosclerosis. *Acta Biochim Biophys Sin (Shanghai)* **2021**, *53*, 1227-1236, doi:10.1093/abbs/gmab102.
10. Li, J.; Xue, H.; Li, T.; Chu, X.; Xin, D.; Xiong, Y.; Qiu, W.; Gao, X.; Qian, M.; Xu, J.; et al. Exosomes derived from mesenchymal stem cells attenuate the progression of atherosclerosis in ApoE. *Biochem Biophys Res Commun* **2019**, *510*, 565-572, doi:10.1016/j.bbrc.2019.02.005.
11. Liu, H.; Liang, Z.; Wang, F.; Zhou, C.; Zheng, X.; Hu, T.; He, X.; Wu, X.; Lan, P. Exosomes from mesenchymal stromal cells reduce murine colonic inflammation via a macrophage-dependent mechanism. *JCI Insight* **2019**, *4*, doi:10.1172/jci.insight.131273.
12. Wu, X.Q.; Yan, T.Z.; Wang, Z.W.; Wu, X.; Cao, G.H.; Zhang, C. BM-MSCs-derived microvesicles promote allogeneic kidney graft survival through enhancing micro-146a expression of dendritic cells. *Immunol Lett* **2017**, *191*, 55-62, doi:10.1016/j.imlet.2017.09.010.
13. Reis, M.; Mavin, E.; Nicholson, L.; Green, K.; Dickinson, A.M.; Wang, X.N. Mesenchymal Stromal Cell-Derived Extracellular Vesicles Attenuate Dendritic Cell Maturation and Function. *Front Immunol* **2018**, *9*, 2538, doi:10.3389/fimmu.2018.02538.
14. Zou, X.; Gu, D.; Zhang, G.; Zhong, L.; Cheng, Z.; Liu, G.; Zhu, Y. NK Cell Regulatory Property is Involved in the Protective Role of MSC-Derived Extracellular Vesicles in Renal Ischemic Reperfusion Injury. *Hum Gene Ther* **2016**, *27*, 926-935, doi:10.1089/hum.2016.057.
15. Fan, Y.; Herr, F.; Vernochet, A.; Mennesson, B.; Oberlin, E.; Durrbach, A. Human Fetal Liver Mesenchymal Stem Cell-Derived Exosomes Impair Natural Killer Cell Function. *Stem Cells Dev* **2019**, *28*, 44-55, doi:10.1089/scd.2018.0015.

16. Loh, J.T.; Zhang, B.; Teo, J.K.H.; Lai, R.C.; Choo, A.B.H.; Lam, K.P.; Lim, S.K. Mechanism for the attenuation of neutrophil and complement hyperactivity by MSC exosomes. *Cytotherapy* **2022**, *24*, 711-719, doi:10.1016/j.jcyt.2021.12.003.
17. Liu, J.; Kuwabara, A.; Kamio, Y.; Hu, S.; Park, J.; Hashimoto, T.; Lee, J.W. Human Mesenchymal Stem Cell-Derived Microvesicles Prevent the Rupture of Intracranial Aneurysm in Part by Suppression of Mast Cell Activation via a PGE2-Dependent Mechanism. *Stem Cells* **2016**, *34*, 2943-2955, doi:10.1002/stem.2448.
18. Lin, T.Y.; Chang, T.M.; Huang, H.C. Extracellular Vesicles Derived from Human Umbilical Cord Mesenchymal Stem Cells Attenuate Mast Cell Activation. *Antioxidants (Basel)* **2022**, *11*, doi:10.3390/antiox11112279.
19. Álvarez, V.; Sánchez-Margallo, F.M.; Macías-García, B.; Gómez-Serrano, M.; Jorge, I.; Vázquez, J.; Blázquez, R.; Casado, J.G. The immunomodulatory activity of extracellular vesicles derived from endometrial mesenchymal stem cells on CD4<sup>+</sup> T cells is partially mediated by TGFβ. *J Tissue Eng Regen Med* **2018**, *12*, 2088-2098, doi:10.1002/term.2743.
20. Crain, S.K.; Robinson, S.R.; Thane, K.E.; Davis, A.M.; Meola, D.M.; Barton, B.A.; Yang, V.K.; Hoffman, A.M. Extracellular Vesicles from Wharton's Jelly Mesenchymal Stem Cells Suppress CD4 Expressing T Cells Through Transforming Growth Factor Beta and Adenosine Signaling in a Canine Model. *Stem Cells Dev* **2019**, *28*, 212-226, doi:10.1089/scd.2018.0097.
21. Kerkelä, E.; Laitinen, A.; Rabinä, J.; Valkonen, S.; Takatalo, M.; Larjo, A.; Veijola, J.; Lampinen, M.; Siljander, P.; Lehenkari, P.; et al. Adenosinergic Immunosuppression by Human Mesenchymal Stromal Cells Requires Co-Operation with T cells. *Stem Cells* **2016**, *34*, 781-790, doi:10.1002/stem.2280.
22. Khare, D.; Or, R.; Resnick, I.; Barkatz, C.; Almogi-Hazan, O.; Avni, B. Mesenchymal Stromal Cell-Derived Exosomes Affect mRNA Expression and Function of B-Lymphocytes. *Front Immunol* **2018**, *9*, 3053, doi:10.3389/fimmu.2018.03053.
23. Zhang, G.; Zou, X.; Miao, S.; Chen, J.; Du, T.; Zhong, L.; Ju, G.; Liu, G.; Zhu, Y. The anti-oxidative role of micro-vesicles derived from human Wharton-Jelly mesenchymal stromal cells through NOX2/gp91(phox) suppression in alleviating renal ischemia-reperfusion injury in rats. *PLoS One* **2014**, *9*, e92129, doi:10.1371/journal.pone.0092129.
24. Zhang, G.; Zou, X.; Huang, Y.; Wang, F.; Miao, S.; Liu, G.; Chen, M.; Zhu, Y. Mesenchymal Stromal Cell-Derived Extracellular Vesicles Protect Against Acute Kidney Injury Through Anti-Oxidation by Enhancing Nrf2/ARE Activation in Rats. *Kidney Blood Press Res* **2016**, *41*, 119-128, doi:10.1159/000443413.
25. Tan, C.Y.; Lai, R.C.; Wong, W.; Dan, Y.Y.; Lim, S.K.; Ho, H.K. Mesenchymal stem cell-derived exosomes promote hepatic regeneration in drug-induced liver injury models. *Stem Cell Res Ther* **2014**, *5*, 76, doi:10.1186/scrt465.
26. Li, C.; Jiao, G.; Wu, W.; Wang, H.; Ren, S.; Zhang, L.; Zhou, H.; Liu, H.; Chen, Y. Exosomes from Bone Marrow Mesenchymal Stem Cells Inhibit Neuronal Apoptosis and Promote Motor Function Recovery via the Wnt/β-catenin Signaling Pathway. *Cell Transplant* **2019**, *28*, 1373-1383, doi:10.1177/0963689719870999.
27. Li, S.; Stöckl, S.; Lukas, C.; Götz, J.; Herrmann, M.; Federlin, M.; Grässel, S. hBMSC-Derived Extracellular Vesicles Attenuate IL-1β-Induced Catabolic Effects on OA-Chondrocytes by Regulating Pro-inflammatory Signaling Pathways. *Front Bioeng Biotechnol* **2020**, *8*, 603598, doi:10.3389/fbioe.2020.603598.
28. Arslan, F.; Lai, R.C.; Smeets, M.B.; Akeroyd, L.; Choo, A.; Aguor, E.N.; Timmers, L.; van Rijen, H.V.; Doevendans, P.A.; Pasterkamp, G.; et al. Mesenchymal stem cell-derived exosomes increase ATP levels, decrease oxidative stress and activate PI3K/Akt pathway to enhance myocardial viability and prevent adverse remodeling after myocardial ischemia/reperfusion injury. *Stem Cell Res* **2013**, *10*, 301-312, doi:10.1016/j.scr.2013.01.002.

29. Lindoso, R.S.; Collino, F.; Bruno, S.; Araujo, D.S.; Sant'Anna, J.F.; Tetta, C.; Provero, P.; Quesenberry, P.J.; Vieyra, A.; Einicker-Lamas, M.; et al. Extracellular vesicles released from mesenchymal stromal cells modulate miRNA in renal tubular cells and inhibit ATP depletion injury. *Stem Cells Dev* **2014**, *23*, 1809-1819, doi:10.1089/scd.2013.0618.
30. Haga, H.; Yan, I.K.; Takahashi, K.; Matsuda, A.; Patel, T. Extracellular Vesicles from Bone Marrow-Derived Mesenchymal Stem Cells Improve Survival from Lethal Hepatic Failure in Mice. *Stem Cells Transl Med* **2017**, *6*, 1262-1272, doi:10.1002/sctm.16-0226.
31. Feng, Y.; Huang, W.; Wani, M.; Yu, X.; Ashraf, M. Ischemic preconditioning potentiates the protective effect of stem cells through secretion of exosomes by targeting Mecp2 via miR-22. *PLoS One* **2014**, *9*, e88685, doi:10.1371/journal.pone.0088685.
32. Yu, B.; Gong, M.; Wang, Y.; Millard, R.W.; Pasha, Z.; Yang, Y.; Ashraf, M.; Xu, M. Cardiomyocyte protection by GATA-4 gene engineered mesenchymal stem cells is partially mediated by translocation of miR-221 in microvesicles. *PLoS One* **2013**, *8*, e73304, doi:10.1371/journal.pone.0073304.
33. Zhu, L.P.; Tian, T.; Wang, J.Y.; He, J.N.; Chen, T.; Pan, M.; Xu, L.; Zhang, H.X.; Qiu, X.T.; Li, C.C.; et al. Hypoxia-elicited mesenchymal stem cell-derived exosomes facilitates cardiac repair through miR-125b-mediated prevention of cell death in myocardial infarction. *Theranostics* **2018**, *8*, 6163-6177, doi:10.7150/thno.28021.
34. Huang, Y.; He, B.; Wang, L.; Yuan, B.; Shu, H.; Zhang, F.; Sun, L. Bone marrow mesenchymal stem cell-derived exosomes promote rotator cuff tendon-bone healing by promoting angiogenesis and regulating M1 macrophages in rats. *Stem Cell Res Ther* **2020**, *11*, 496, doi:10.1186/s13287-020-02005-x.
35. Lou, G.; Yang, Y.; Liu, F.; Ye, B.; Chen, Z.; Zheng, M.; Liu, Y. MiR-122 modification enhances the therapeutic efficacy of adipose tissue-derived mesenchymal stem cells against liver fibrosis. *J Cell Mol Med* **2017**, *21*, 2963-2973, doi:10.1111/jcmm.13208.
36. Zhang, B.; Wang, M.; Gong, A.; Zhang, X.; Wu, X.; Zhu, Y.; Shi, H.; Wu, L.; Zhu, W.; Qian, H.; et al. HucMSC-Exosome Mediated-Wnt4 Signaling Is Required for Cutaneous Wound Healing. *Stem Cells* **2015**, *33*, 2158-2168, doi:10.1002/stem.1771.
37. Chew, J.R.J.; Chuah, S.J.; Teo, K.Y.W.; Zhang, S.; Lai, R.C.; Fu, J.H.; Lim, L.P.; Lim, S.K.; Toh, W.S. Mesenchymal stem cell exosomes enhance periodontal ligament cell functions and promote periodontal regeneration. *Acta Biomater* **2019**, *89*, 252-264, doi:10.1016/j.actbio.2019.03.021.
38. Mao, Q.; Nguyen, P.D.; Shanti, R.M.; Shi, S.; Shakoori, P.; Zhang, Q.; Le, A.D. Gingiva-Derived Mesenchymal Stem Cell-Extracellular Vesicles Activate Schwann Cell Repair Phenotype and Promote Nerve Regeneration. *Tissue Eng Part A* **2019**, *25*, 887-900, doi:10.1089/ten.TEA.2018.0176.
39. Tomasoni, S.; Longaretti, L.; Rota, C.; Morigi, M.; Conti, S.; Gotti, E.; Capelli, C.; Introna, M.; Remuzzi, G.; Benigni, A. Transfer of growth factor receptor mRNA via exosomes unravels the regenerative effect of mesenchymal stem cells. *Stem Cells Dev* **2013**, *22*, 772-780, doi:10.1089/scd.2012.0266.
